# Supplementary material for: Well-defined nanoporous palladium for electrochemical reductive dechlorination
Source: Royal Society of Chemistry journal article supplement (doi:10.1039/c0cp02178d), 2011-01-01
Supplement: c0cp02178d.pdf [file c0cp02178d.pdf]

Electronic Supplementary Information (ESI)

**Well-defined nanoporous palladium for electrochemical  
reductive dechlorination**

Wenjing Li,<sup>a</sup> Houyi Ma,<sup>\*,a,b</sup> Lihui Huang,<sup>c</sup> and Yi Ding<sup>\*,a</sup>

<sup>a</sup>*Key Laboratory for Colloid and Interface Chemistry of State Education Ministry, School of Chemistry and Chemical Engineering, Shandong University, Jinan 250100, China*

<sup>b</sup>*Beijing National Laboratory for Molecular Science, Beijing 100190, China*

<sup>c</sup>*School of Environmental Science and Engineering, Shandong University, Jinan 250100, China*

\*Corresponding Author: Prof. Houyi Ma, E-mail: [hyma@sdu.edu.cn](mailto:hyma@sdu.edu.cn)

Prof. Yi Ding, E-mail: [yding@sdu.edu.cn](mailto:yding@sdu.edu.cn)

**Pore size (and ligament thickness) distribution, HRTEM and TEM images, EDS spectra, XRD patterns, CVs, and Tables.**

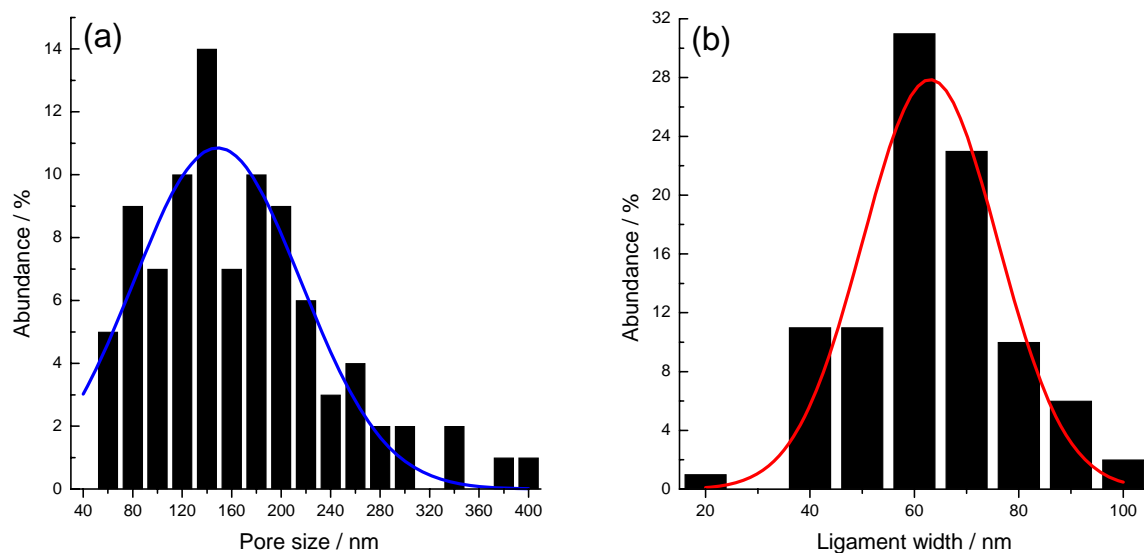

**Fig.S1** Pore size (a) and ligament thickness (b) distribution of the nanoporous Pd (np-Pd) sample shown in Fig.1a.

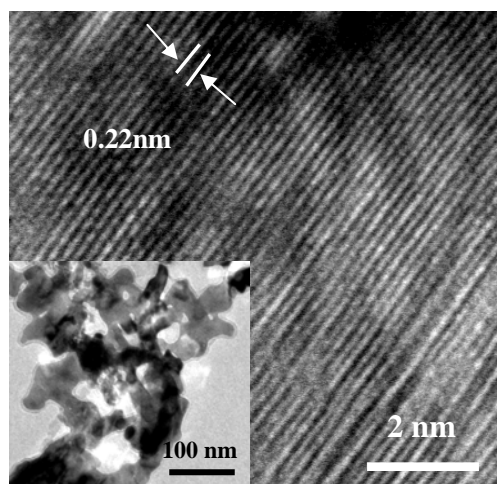

**Fig.S2** HRTEM image of an as-prepared np-Pd sample. The inset shows the TEM image for the np-Pd.

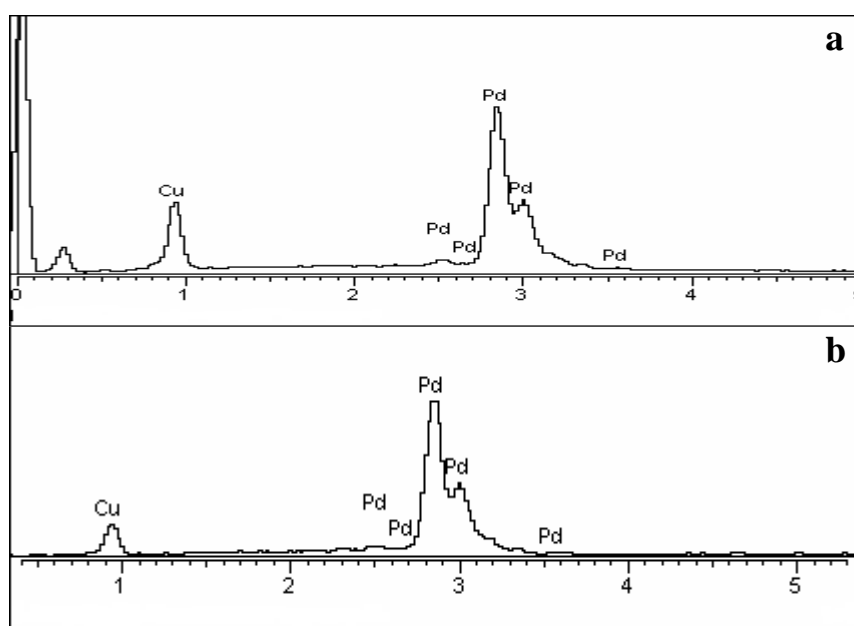

**Fig.S3** EDS analysis of a nanoporous Pd (np-Pd) sample (a) and an as-treated nanoporous Pd (*t*-np-Pd) sample (b).

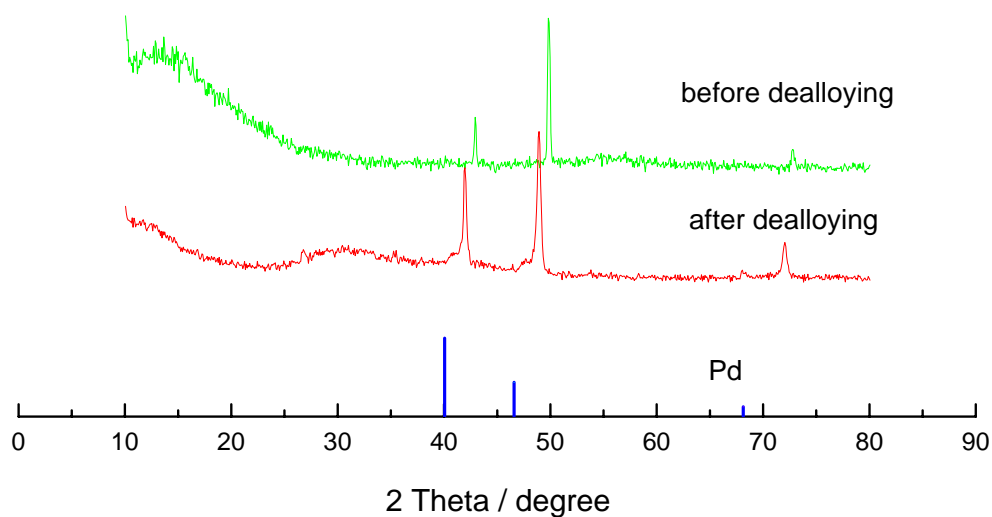

**Fig.S4** XRD patterns for Pd<sub>25</sub>Cu<sub>75</sub> samples before and after electrochemical dealloying in ionic liquid [BMIM]BF<sub>4</sub>. The standard pattern for pure Pd (JCPDS 65-2867) is also placed at the bottom for comparison.

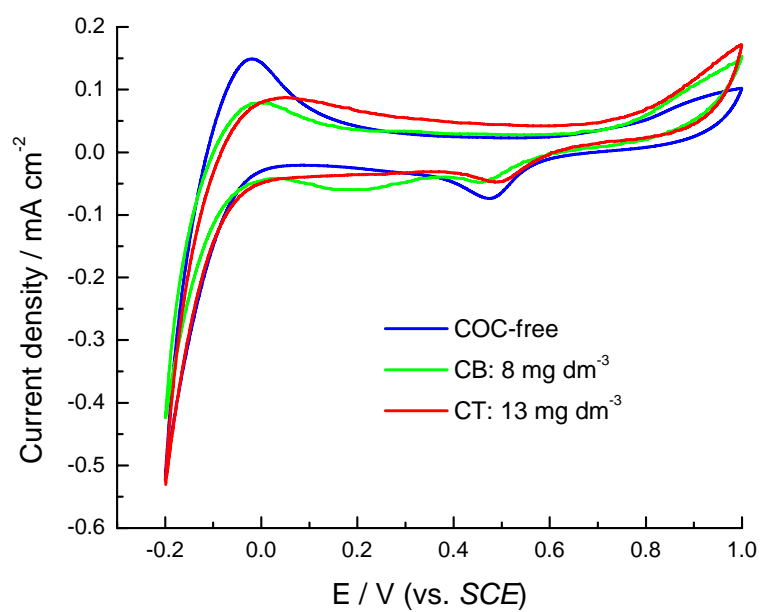

**Fig.S5** CVs of a bulk Pd electrode in the COC-free and COC-containing  $0.5 \text{ mol dm}^{-3} \text{ H}_2\text{SO}_4$  solutions. Scan rate:  $50 \text{ mVs}^{-1}$ .

**Table S1** The removal efficiency of CT and CB on untreated nanoporous Pd (np-Pd) electrodes (prepared by dealloying method in ionic liquid [BMIM]BF<sub>4</sub>) under different electrolysis conditions.

| Potential and time | CT ( / % ) on np-Pd |
|--------------------|---------------------|
| -0.06 V for 30 min | 58.3%               |
| -0.15 V for 30 min | 30.4%               |
| -0.22 V for 30 min | 94.8%               |
|                    | CB ( / % ) on np-Pd |
| -0.06 V for 30 min | 47.6%               |
| -0.15 V for 30 min | 31.9%               |
| -0.22 V for 30 min | 77.2%               |

**Table S2.** The removal efficiency of CT and CB on nanoporous Pd (np-Pd) electrodes (prepared by dealloying method in  $1 \text{ mol dm}^{-3} \text{ H}_2\text{SO}_4$ ) under different electrolysis conditions.

| Potential and time | CT ( / % ) on np-Pd dealloyed in $\text{H}_2\text{SO}_4$ |
|--------------------|----------------------------------------------------------|
| -0.06 V for 30 min | 55.7%                                                    |
| -0.15 V for 30 min | 27.6%                                                    |
| -0.22 V for 30 min | 89.8%                                                    |
|                    | CB ( / % ) on np-Pd dealloyed in $\text{H}_2\text{SO}_4$ |
| -0.06 V for 30 min | 41.3%                                                    |
| -0.15 V for 30 min | 28.0%                                                    |
| -0.22 V for 30 min | 74.9%                                                    |
